# Supplementary material for: A Transcriptome Array-Based Approach Links Proteinuria and Distinct Molecular Signatures to Intrarenal Expression of Type I Interferon IFNA5 in Lupus Nephritis
Source: MDPI journal article supplement (doi:10.3390/ijms241310636), 2023-06-25
Supplement: s1 [file s1]

# **A Transcriptome Array-Based Approach Links Proteinuria and Distinct Molecular Signatures to Intrarenal Expression of Type I Interferon *IFNA5* in Lupus Nephritis**

## **Supplementary Material**

**Peter Korsten and Björn Tampe \***

Department of Nephrology and Rheumatology, University Medical Center Göttingen,  
37075 Göttingen, Germany; peter.korsten@med.uni-goettingen.de

\* Correspondence: bjoern.tampe@med.uni-goettingen.de; Tel.: +49-5513910575

**Table S1. Clinical and laboratory parameters of included samples extracted from the Nephroseq database.**

| Sample    | Sex    | Serum creatinine level (mg/dL) | eGFR (MDRD) | Delta eGFR   |
|-----------|--------|--------------------------------|-------------|--------------|
| LN301_Tub | Female | 0,9                            | 75          | 2,324202117  |
| LN302_Tub | Female | 0,7                            | 101         | 4,958448515  |
| LN304_Tub | Male   | 0,9                            | 94          | 49,96546067  |
| LN305_Tub | Male   | 0,9                            | 97          | -1,612261619 |
| LN306_Tub | Female | 1,1                            | 62          | 4,459519742  |
| LN307_Tub | Female | 1,1                            | 61          | 3,086092528  |
| LN308_Tub | Female | 3,2                            | 17          | -0,210183092 |
| LN309_Tub | Female | 1                              | 75          | 37,10504736  |
| LN310_Tub | Female | 1,6                            | 37          | 4,621487095  |
| LN311_Tub | Male   | 1,3                            | 58          | -1,880480943 |
| LN312_Tub | Female | 1,6                            | 38          | 6,955256086  |
| LN313_Tub | Female | 3,1                            | 19          | -2,377861108 |
| LN314_Tub | Female | 1,2                            | 51          | 3,488368579  |
| LN318_Tub | Female | 3                              | 20          | -0,776793162 |
| LN319_Tub | Female | 2,2                            | 31          | 11,07525153  |
| LN323_Tub | Female | 0,7                            | 104         | -3,141816823 |
| LN329_Tub | Female | 0,78                           | 102         | -5,001560199 |
| LN336_Tub | Female | 3,7                            | 14          |              |
| LN338_Tub | Female | 0,9                            | 73          | -4,744832513 |
| LN340_Tub | Female | 1,1                            | 54          | -11,01588705 |
| LN342_Tub | Female | 0,6                            |             |              |
| LN343_Tub | Female | 1,8                            | 38          | 10,95524633  |
| LN346_Tub | Female |                                |             |              |
| LN348_Tub | Male   | 1,2                            | 72          | 2,127400855  |
| LN349_Tub | Male   | 1                              | 99          |              |
| LN352_Tub | Female | 2,7                            | 22          |              |
| LN357_Tub | Female | 1,16                           | 63          | 14,98655473  |
| LN358_Tub | Male   | 1,17                           | 83          | -7,985578763 |
| LN359_Tub | Female | 0,75                           | 97          | -2,284700347 |
| LN360_Tub | Female | 1,03                           | 68          | 7,789398888  |
| LN361_Tub | Male   | 0,98                           | 93          | 1,894894043  |
| LN362_Tub | Female | 0,84                           | 93          | -1,998540763 |

**Table S2. Included samples and corresponding log<sub>2</sub> mRNA expression levels extracted from the Nephroseq database for tubulointerstitial mRNA expression levels of complement components.**

| Sample    | IFNA1 /<br>209375 at | IFNA10 /<br>208261 x at | IFNA13 /<br>208344 x at | IFNA14 /<br>208182 x at | IFNA16 /<br>208448 x at | IFNA17 /<br>211405 x at | IFNA2 /<br>211338 at | IFNA21 /<br>211145 x at | IFNA4 /<br>207964 x at | IFNA5 /<br>214569 at | IFNA6 /<br>208548 at | IFNA7 /<br>208259 x at | IFNA8 /<br>207932 at | IFNB1 /<br>208173 at | IFNW1 /<br>207817 at |
|-----------|----------------------|-------------------------|-------------------------|-------------------------|-------------------------|-------------------------|----------------------|-------------------------|------------------------|----------------------|----------------------|------------------------|----------------------|----------------------|----------------------|
| LN301_Tub | -2,08047             | -1,65372                | 0,27475                 | -1,17219                | -1,98604                | -0,48206                | -2,28553             | -0,91387                | -1,30563               | -2,04937             | -2,06165             | -1,16509               | -2,36714             | -1,66683             | -1,23954             |
| LN302_Tub | -1,97323             | -1,76888                | 0,55028                 | -1,31693                | -1,84488                | -0,24964                | -2,19791             | -0,89311                | -1,21963               | -2,18881             | -1,72601             | -0,97061               | -2,29868             | -1,31557             | -1,41559             |
| LN304_Tub | -2,05384             | -1,90176                | 0,37865                 | -1,55699                | -1,91631                | -0,56298                | -2,2115              | -0,99934                | -1,26676               | -2,39952             | -1,73944             | -1,22182               | -2,27097             | -1,12142             | -1,27352             |
| LN305_Tub | -2,06502             | -1,60073                | 0,35504                 | -1,05436                | -1,7828                 | -0,37023                | -1,90816             | -0,69549                | -1,09117               | -2,11573             | -1,85127             | -0,6471                | -2,12856             | -1,1831              | -1,45649             |
| LN306_Tub | -1,96779             | -1,50934                | 0,38123                 | -1,35917                | -1,6836                 | -0,39711                | -2,20255             | -0,88988                | -1,2627                | -2,09268             | -1,93797             | -0,65541               | -2,2819              | -1,85533             | -1,0994              |
| LN307_Tub | -2,05293             | -1,54591                | 0,5811                  | -1,12715                | -1,60481                | -0,26186                | -2,32218             | -0,85792                | -1,0248                | -1,91794             | -1,76175             | -0,87257               | -2,3622              | -1,37816             | -1,24369             |
| LN308_Tub | -2,0959              | -1,77156                | 0,14102                 | -1,47803                | -1,7542                 | -0,59652                | -2,31233             | -1,08268                | -1,31884               | -2,45246             | -1,89239             | -1,01483               | -2,54103             | -1,81787             | -1,25897             |
| LN309_Tub | -1,96978             | -1,64407                | 0,3697                  | -1,27018                | -1,80119                | -0,37938                | -2,24318             | -0,98237                | -1,10933               | -2,00947             | -1,81279             | -1,00878               | -2,4031              | -1,28603             | -1,14552             |
| LN310_Tub | -2,05713             | -1,78435                | 0,20882                 | -1,24005                | -1,883                  | -0,70345                | -2,1458              | -1,1233                 | -1,34412               | -2,18925             | -1,83617             | -1,19855               | -2,4315              | -1,53191             | -1,39674             |
| LN311_Tub | -2,01192             | -1,4979                 | 0,39485                 | -1,20485                | -1,69591                | -0,38055                | -2,0334              | -1,12039                | -1,16074               | -2,20852             | -2,0334              | -0,96848               | -2,3632              | -1,57608             | -1,16898             |
| LN312_Tub | -2,24018             | -1,67533                | 0,26602                 | -1,43895                | -1,85579                | -0,27596                | -2,29562             | -0,86516                | -1,2609                | -2,2385              | -1,90895             | -1,15364               | -2,39213             | -1,57422             | -1,31254             |
| LN313_Tub | -2,15523             | -1,4989                 | 0,55586                 | -1,29599                | -1,84568                | -0,34825                | -2,26979             | -0,85342                | -1,20595               | -2,18548             | -1,89356             | -1,04342               | -2,4103              | -1,5943              | -1,37023             |
| LN314_Tub | -2,25216             | -1,47094                | 0,61906                 | -0,99384                | -1,76791                | -0,10114                | -2,31867             | -0,91618                | -1,1559                | -2,06038             | -1,7235              | -1,11694               | -2,26927             | -1,39865             | -1,16944             |
| LN318_Tub | -2,0718              | -1,5846                 | 0,40579                 | -1,12511                | -1,52343                | -0,44873                | -2,15224             | -0,82657                | -0,82351               | -2,16599             | -1,93128             | -0,75365               | -2,32195             | -1,5753              | -1,42301             |
| LN319_Tub | -2,06198             | -1,36599                | 0,5637                  | -1,11837                | -1,67178                | -0,14947                | -2,24966             | -0,85826                | -1,111                 | -2,09772             | -1,83654             | -0,91337               | -2,31859             | -1,41361             | -1,49886             |
| LN323_Tub | -1,8347              | -1,56096                | 0,57893                 | -1,09862                | -1,81971                | 0,02787                 | -2,33987             | -0,92505                | -1,01931               | -2,08949             | -1,90873             | -0,82507               | -1,96842             | -1,27674             | -1,07847             |
| LN329_Tub | -2,27407             | -1,45433                | 0,2601                  | -1,25135                | -1,92308                | -0,44391                | -2,09877             | -0,90578                | -1,26594               | -2,10895             | -1,95747             | -1,23747               | -2,50931             | -1,56133             | -1,3212              |
| LN336_Tub | -2,20765             | -1,63176                | 0,57234                 | -1,21398                | -1,68664                | -0,30099                | -2,08658             | -0,99141                | -1,11728               | -2,20461             | -1,90793             | -1,00034               | -2,34365             | -1,60677             | -1,35997             |
| LN338_Tub | -2,1496              | -1,71705                | 0,07373                 | -1,16546                | -1,8411                 | -0,66175                | -2,18113             | -1,17907                | -1,30976               | -2,0859              | -2,02742             | -1,17482               | -2,22587             | -1,72802             | -1,45746             |
| LN340_Tub | -2,0481              | -1,74892                | 0,22276                 | -1,47866                | -1,96811                | -0,67498                | -2,28516             | -1,13035                | -1,28337               | -2,20582             | -2,08848             | -1,20573               | -2,37004             | -1,59998             | -1,37607             |
| LN342_Tub | -2,02493             | -1,74314                | 0,39821                 | -1,4871                 | -1,78404                | -0,58792                | -2,16452             | -1,20556                | -1,2068                | -2,30553             | -2,06158             | -1,08489               | -2,34494             | -1,57125             | -1,44668             |
| LN343_Tub | -2,19222             | -1,67923                | 0,18536                 | -1,36731                | -1,89108                | -0,61268                | -2,27154             | -1,16664                | -1,2932                | -2,09217             | -2,00635             | -1,37431               | -2,50055             | -1,71711             | -1,41548             |
| LN346_Tub | -2,18651             | -1,75543                | 0,19551                 | -1,24194                | -1,95464                | -0,40872                | -2,16086             | -0,86126                | -1,10954               | -2,28846             | -1,63264             | -1,06929               | -2,31158             | -1,14118             | -1,42799             |
| LN348_Tub | -2,07301             | -1,57797                | 0,76007                 | -1,3739                 | -1,5916                 | -0,39316                | -2,22638             | -0,97279                | -1,14278               | -1,8191              | -1,9423              | -0,86296               | -2,39581             | -1,53814             | -1,19483             |
| LN349_Tub | -2,18834             | -1,62125                | 0,37985                 | -1,16103                | -1,72898                | -0,2632                 | -2,38491             | -1,06997                | -1,16232               | -1,98653             | -1,92614             | -0,93014               | -2,33245             | -1,33688             | -1,4212              |
| LN352_Tub | -2,13748             | -1,63244                | 0,33697                 | -1,23159                | -1,6904                 | -0,53405                | -2,35958             | -1,15149                | -1,26872               | -2,2741              | -2,09915             | -1,15513               | -2,23846             | -1,52875             | -1,35104             |
| LN357_Tub | -2,11307             | -1,58782                | 0,40083                 | -1,63712                | -1,74331                | -0,28115                | -2,18682             | -0,94055                | -1,29045               | -1,94301             | -1,84002             | -1,41478               | -2,32803             | -1,47318             | -1,09078             |
| LN358_Tub | -1,95207             | -1,54166                | 0,4094                  | -1,18161                | -1,77083                | -0,33416                | -2,23322             | -1,01292                | -1,19758               | -2,19681             | -1,85298             | -1,12585               | -2,42855             | -1,45475             | -1,36203             |
| LN359_Tub | -2,07771             | -1,51579                | 0,36791                 | -1,11983                | -1,72739                | -0,36188                | -2,22385             | -1,10291                | -1,10214               | -2,1205              | -1,96475             | -1,01188               | -2,40965             | -1,68954             | -1,3179              |
| LN360_Tub | -2,19632             | -1,80639                | 0,36226                 | -1,23981                | -1,69272                | -0,39823                | -2,20746             | -1,24811                | -1,20249               | -2,0969              | -1,98046             | -0,92112               | -2,36354             | -1,39857             | -1,34374             |
| LN361_Tub | -2,06726             | -1,66582                | 0,22592                 | -1,07396                | -1,85468                | -0,32695                | -2,27562             | -0,90233                | -1,08878               | -2,0648              | -1,5771              | -1,04041               | -2,31626             | -1,64322             | -1,1518              |
| LN362_Tub | -2,15535             | -1,6665                 | 0,30013                 | -1,41174                | -1,89745                | -0,49387                | -2,31984             | -1,24954                | -1,51271               | -2,10991             | -1,95309             | -1,11137               | -2,34137             | -1,56522             | -1,34532             |

**Table S3. Included samples and corresponding log<sub>2</sub> mRNA expression levels extracted from the Nephroseq database for glomerular mRNA expression levels of complement components.**

| Sample     | IFNA1 /<br>208375 at | IFNA10 /<br>208261 x at | IFNA13 /<br>208344 x at | IFNA14 /<br>208182 x at | IFNA16 /<br>208448 x at | IFNA17 /<br>211405 x at | IFNA2 /<br>211338 at | IFNA21 /<br>211145 x at | IFNA4 /<br>207964 x at | IFNA5 /<br>214569 at | IFNA6 /<br>208548 at | IFNA7 /<br>208259 x at | IFNA8 /<br>207932 at | IFNB1 /<br>208173 at | IFNW1 /<br>207817 at |
|------------|----------------------|-------------------------|-------------------------|-------------------------|-------------------------|-------------------------|----------------------|-------------------------|------------------------|----------------------|----------------------|------------------------|----------------------|----------------------|----------------------|
| LN401_Glom | -2.50451             | -1.73995                | -0.56132                | -1.85801                | -1.97893                | -0.74454                | -2.49545             | -1.25245                | -1.51307               | -2.57571             | -2.27257             | -1.14337               | -2.56138             | -1.80049             | -1.3134              |
| LN402_Glom | -2.45326             | -1.67562                | -0.41558                | -1.61672                | -1.81682                | -0.4403                 | -2.27861             | -1.30735                | -1.48491               | -2.47016             | -2.41277             | -0.96116               | -2.52619             | -1.70005             | -1.51747             |
| LN404_Glom | -2.5055              | -1.42683                | -0.2322                 | -1.62742                | -2.07116                | -0.52922                | -2.43053             | -1.11098                | -1.37703               | -2.35942             | -2.37637             | -1.22576               | -2.49287             | -1.92371             | -1.23857             |
| LN405_Glom | -2.36916             | -1.43245                | -0.46002                | -1.55626                | -1.65265                | -0.35678                | -2.32439             | -1.20443                | -1.17571               | -2.48789             | -2.34374             | -0.95766               | -2.74022             | -1.43551             | -1.29854             |
| LN406_Glom | -2.30793             | -1.57524                | -0.41309                | -1.81795                | -2.05704                | -0.8546                 | -2.38654             | -1.32863                | -1.49821               | -2.35655             | -2.4698              | -1.33965               | -2.5592              | -1.61178             | -1.03867             |
| LN407_Glom | -2.41777             | -1.58516                | -0.64042                | -2.01108                | -2.0704                 | -0.58068                | -2.4702              | -1.50986                | -1.50051               | -2.62936             | -2.39606             | -1.19576               | -2.45981             | -2.00039             | -1.2077              |
| LN408_Glom | -2.45235             | -1.67425                | -0.51328                | -1.82703                | -2.03033                | -0.67655                | -2.57346             | -1.23973                | -1.54614               | -2.52627             | -2.35953             | -1.35791               | -2.61289             | -1.89479             | -1.48244             |
| LN409_Glom | -2.39875             | -1.59463                | -0.57988                | -1.66655                | -1.89128                | -0.47193                | -2.37285             | -1.20118                | -1.33897               | -2.50848             | -2.19352             | -1.31101               | -2.4818              | -1.81485             | -1.21429             |
| LN410_Glom | -2.53403             | -1.73827                | -0.59291                | -1.68766                | -2.1693                 | -0.58631                | -2.46085             | -1.19171                | -1.47804               | -2.63053             | -2.43066             | -1.42543               | -2.6809              | -1.70239             | -1.18473             |
| LN411_Glom | -2.3341              | -1.67354                | -0.33735                | -1.41875                | -1.81378                | -0.36272                | -2.51379             | -0.95995                | -1.14137               | -2.39757             | -2.31056             | -1.06675               | -2.59247             | -1.86096             | -1.28915             |
| LN412_Glom | -2.4675              | -1.27459                | -0.18412                | -1.2799                 | -1.49329                | -0.15056                | -2.39153             | -0.91656                | -1.27769               | -2.31168             | -2.40074             | -1.14085               | -2.61922             | -1.68494             | -1.23574             |
| LN413_Glom | -2.40138             | -2.0145                 | -0.50958                | -1.86994                | -2.09091                | -0.7303                 | -2.53878             | -1.27192                | -1.71916               | -2.61383             | -2.48315             | -1.29426               | -2.7545              | -1.66745             | -1.18077             |
| LN414_Glom | -2.36377             | -1.56422                | -0.72221                | -1.77985                | -1.92653                | -0.67527                | -2.42455             | -1.28844                | -1.4596                | -2.66563             | -2.35586             | -1.06162               | -2.38                | -1.88537             | -1.09708             |
| LN418_Glom | -2.5507              | -1.54791                | -0.39187                | -1.57864                | -1.75823                | -0.4064                 | -2.51622             | -1.14095                | -1.42896               | -2.54435             | -2.38203             | -1.21604               | -2.6524              | -1.5651              | -1.22015             |
| LN419_Glom | -2.40057             | -1.59762                | -0.3911                 | -1.77668                | -2.02803                | -0.48868                | -2.4632              | -1.36559                | -1.55719               | -2.54906             | -2.3618              | -1.25008               | -2.58565             | -1.82632             | -1.20783             |
| LN423_Glom | -2.26479             | -1.47177                | -0.52829                | -1.80501                | -1.9125                 | -0.78547                | -2.41977             | -1.02906                | -1.51102               | -2.65295             | -2.23239             | -1.21659               | -2.45066             | -1.65204             | -0.89501             |
| LN430_Glom | -2.15875             | -1.23968                | 0.09943                 | -1.23216                | -1.35322                | -0.25189                | -2.34525             | -0.81748                | -1.08603               | -2.2802              | -2.23384             | -0.78841               | -2.55047             | -1.41568             | -1.28592             |
| LN438_Glom | -2.30384             | -1.72988                | -0.33367                | -1.94481                | -2.11377                | -0.80284                | -2.60642             | -1.21895                | -1.43515               | -2.47365             | -2.33592             | -1.4053                | -2.67249             | -1.85786             | -1.34993             |
| LN440_Glom | -2.37176             | -1.36946                | -0.07553                | -1.59178                | -1.79532                | -0.45097                | -2.49182             | -0.98879                | -1.29988               | -2.40883             | -2.2873              | -0.92404               | -2.45276             | -1.20429             | -1.09183             |
| LN442_Glom | -2.35647             | -1.47896                | -0.39856                | -1.59366                | -1.70781                | -0.56839                | -2.42524             | -1.10735                | -1.29348               | -2.22103             | -2.38107             | -1.10189               | -2.5422              | -1.48621             | -1.2385              |
| LN444_Glom | -2.31597             | -1.55373                | -0.58804                | -1.81064                | -2.13859                | -0.6715                 | -2.41693             | -1.15732                | -1.08946               | -2.52994             | -2.4005              | -1.07769               | -2.56087             | -1.71096             | -1.295               |
| LN445_Glom | -2.4103              | -1.61631                | -0.36329                | -2.04907                | -1.8717                 | -0.74407                | -2.44911             | -1.21694                | -1.59253               | -2.58225             | -2.37407             | -1.35068               | -2.46387             | -1.56336             | -1.17368             |
| LN448_Glom | -2.42439             | -1.53189                | -0.36731                | -1.67289                | -2.05836                | -0.72717                | -2.61405             | -1.12189                | -1.39382               | -2.36635             | -2.204               | -1.36951               | -2.55806             | -1.69798             | -1.01675             |
| LN450_Glom | -2.35296             | -1.8507                 | -0.59033                | -1.83289                | -2.15588                | -0.75272                | -2.30968             | -1.08172                | -1.37242               | -2.46157             | -2.26913             | -1.39638               | -2.67857             | -2.03796             | -1.10112             |
| LN451_Glom | -2.29781             | -1.57875                | -0.08399                | -1.95421                | -2.00188                | -0.6017                 | -2.31989             | -1.19695                | -1.37446               | -2.56956             | -2.33428             | -0.96226               | -2.53558             | -1.58948             | -1.02521             |
| LN454_Glom | -2.30391             | -1.66011                | -0.58012                | -1.90976                | -1.94629                | -0.5283                 | -2.52659             | -1.40355                | -1.34868               | -2.51105             | -2.32021             | -1.10077               | -2.44932             | -1.60553             | -1.2863              |
| LN462_Glom | -2.42907             | -1.58342                | -0.57325                | -1.89571                | -2.12417                | -0.8109                 | -2.56835             | -1.32777                | -1.51948               | -2.62439             | -2.48698             | -1.54229               | -2.66474             | -1.86598             | -1.28766             |
| LN463_Glom | -2.46748             | -1.57268                | -0.45767                | -1.76169                | -1.9451                 | -0.67057                | -2.61254             | -1.3734                 | -1.43734               | -2.54416             | -2.38071             | -1.33043               | -2.62745             | -1.64422             | -1.29502             |
| LN464_Glom | -2.37709             | -1.68571                | -0.24545                | -1.84287                | -1.96599                | -0.81272                | -2.67896             | -1.25596                | -1.48426               | -2.56445             | -2.40378             | -1.20896               | -2.60125             | -1.67527             | -1.3577              |
| LN465_Glom | -2.4985              | -1.54055                | -0.42717                | -1.75672                | -1.93003                | -0.66184                | -2.44352             | -1.30127                | -1.34706               | -2.42245             | -2.28944             | -1.1568                | -2.58315             | -1.88545             | -1.15167             |
| LN466_Glom | -2.56579             | -1.75499                | -0.44952                | -1.91813                | -2.02014                | -0.70028                | -2.56645             | -1.14991                | -1.33426               | -2.52798             | -2.37005             | -1.15532               | -2.68272             | -1.61685             | -1.29934             |
| LN467_Glom | -2.48847             | -1.52716                | -0.50498                | -1.83176                | -2.07684                | -0.62341                | -2.49818             | -1.29549                | -1.34892               | -2.6501              | -2.49699             | -1.19678               | -2.68417             | -1.86751             | -1.4434              |

| <b>Table S4. Gene set enrichment in association with intrarenal <i>IFNA5</i> expression.</b> |                            |                       |                |
|----------------------------------------------------------------------------------------------|----------------------------|-----------------------|----------------|
| <b>Pathway name</b>                                                                          | <b>reactome identifier</b> | <b><i>p</i> value</b> | <b>Species</b> |
| Rhesus blood group biosynthesis                                                              | R-HSA-9037628              | 1,00E-5               | Homo sapiens   |
| Reversible hydration of carbon dioxide                                                       | R-HSA-1475029              | 2.22E-5               | Homo sapiens   |
| GLI proteins bind promoters of Hh responsive genes to promote transcription                  | R-HSA-5635851              | 2.31E-3               | Homo sapiens   |
| Peptide ligand-binding receptors                                                             | R-HSA-375276               | 2.76E-3               | Homo sapiens   |
| BMAL1: CLOCK, NPAS2 activates circadian gene expression                                      | R-HSA-1368108              | 2.9E-3                | Homo sapiens   |
| Signaling by BMP                                                                             | R-HSA-201451               | 3.05E-3               | Homo sapiens   |
| TRAF6-mediated IRF7 activation                                                               | R-HSA-933541               | 3.25E-3               | Homo sapiens   |
| HSF1-dependent transactivation                                                               | R-HSA-3371571              | 3.27E-3               | Homo sapiens   |
| Activation of PUMA and translocation to mitochondria                                         | R-HSA-139915               | 4.3E-3                | Homo sapiens   |
| Glycoprotein hormones                                                                        | R-HSA-209822               | 4.3E-3                | Homo sapiens   |
| Defective AVP does not bind AVPR1A,B and causes neurohypophyseal diabetes insipidus (NDI)    | R-HSA-5619099              | 4.32E-3               | Homo sapiens   |
| Class A/1 (rhodopsin-like receptors)                                                         | R-HSA-373076               | 4.45E-3               | Homo sapiens   |
| Attenuation phase                                                                            | R-HSA-3371568              | 4.46E-3               | Homo sapiens   |
| Mineralocorticoid biosynthesis                                                               | R-HSA-193993               | 5.84E-3               | Homo sapiens   |
| GPCR ligand binding                                                                          | R-HSA-500792               | 8.51E-3               | Homo sapiens   |
| Peptide hormone biosynthesis                                                                 | R-HSA-209952               | 8.8E-3                | Homo sapiens   |
| Metabolism of steroid hormones                                                               | R-HSA-196071               | 9.31E-3               | Homo sapiens   |
